# Supplementary material for: Rotational barriers of biphenyls having heavy heteroatoms as ortho-substituents: experimental and theoretical determination of steric effects
Source: Royal Society of Chemistry journal article supplement (doi:10.1039/c1ob06688a), 2011-11-17
Supplement: c1ob06688a.pdf [file c1ob06688a.pdf]

# Rotational Barriers of Biphenyls Having Heavy Heteroatoms as *ortho*-Substituents: Experimental and Theoretical Determination of Steric Effects

Lodovico Lunazzi,<sup>a</sup> Michele Mancinelli,<sup>a</sup> Andrea Mazzanti,<sup>\*a</sup>  
Susan Lepri,<sup>b</sup> Renzo Ruzziconi<sup>\*b</sup> and Manfred Schlosser<sup>\*c</sup>

<sup>a</sup> Department of Organic Chemistry “A. Mangini”, University of Bologna, Viale Risorgimento 4, I-40136 Bologna / Italy; Fax: +39 051 2093654; Tel: +39 051 2093632;  
E-mail: [andrea.mazzanti@unibo.it](mailto:andrea.mazzanti@unibo.it)

<sup>b</sup> Chemistry Department, University of Perugia, Via Elce di Sotto 10, I-06100 Perugia / Italy  
Fax: +39 075 5855262; Tel: +39 075 5855543; E-mail: [ruzzchor@unipg.it](mailto:ruzzchor@unipg.it)

<sup>c</sup> Institute of Chemical Sciences and Engineering, Ecole Polytechnique Fédérale (EPFL – BCh), CH-1015 Lausanne, Switzerland Tel: +41 021 6939351; E-mail: [manfred.schlosser@epfl.ch](mailto:manfred.schlosser@epfl.ch)

ELECTRONIC SUPPLEMENTARY INFORMATION

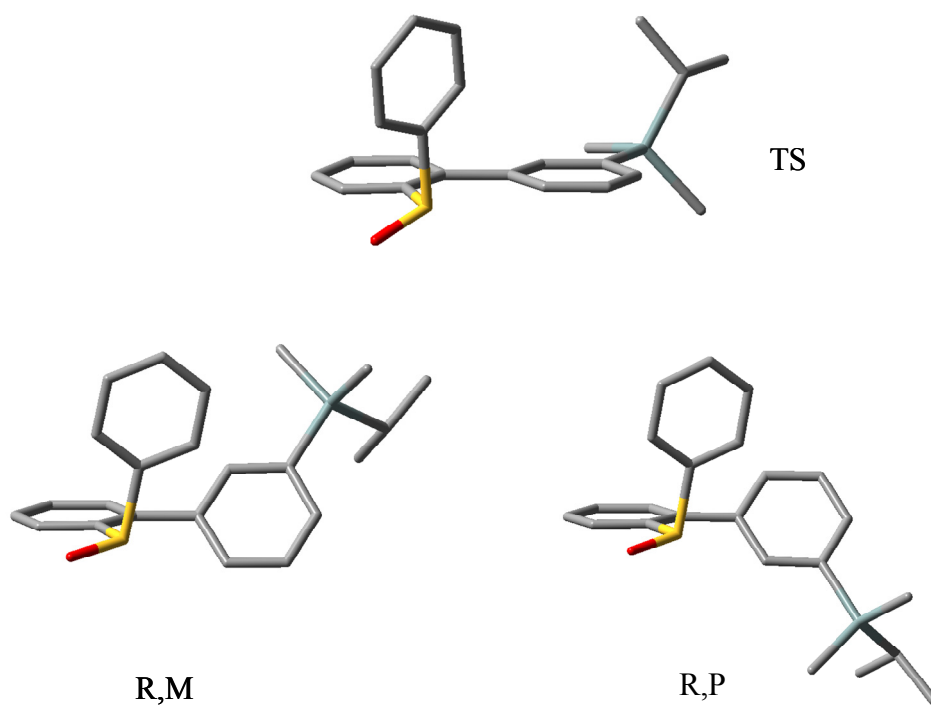

**FIGURE S1.** DFT computed structures of the two conformational diastereoisomers of ortho pphenylsulphoxide derivative **3** (bottom) generated by the restricted aryl-aryl rotation. The R\*P\* form (right) is more stable by  $0.1 \text{ kcal mol}^{-1}$  with respect to the R,M (left). On the top is reported the computed transition state (TS) for the aryl-aryl rotation process.

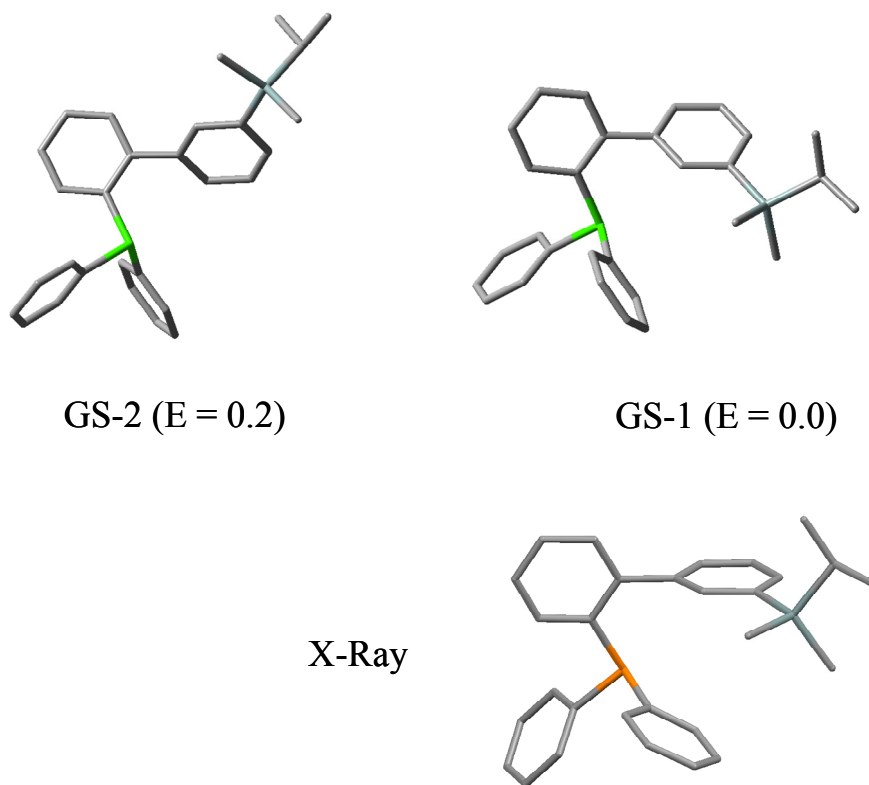

**FIGURE S2.** DFT computed (top) and X-ray structures (bottom) of compound **9** (the relative computed energies  $E$  are in  $\text{kcal mol}^{-1}$ ). The less stable conformer GS-2 has the aryl-aryl dihedral angle of  $125^\circ$  whereas the most stable conformer GS-1 has a dihedral angle of  $66^\circ$ . The crystal lattice contains a 1:1 ratio of phosphine **9** and of phosphine oxide **10** (the latter is not reported in the present picture since it is equal to that reported in Figure 3 of the main text).

Crystal data and structure refinement for compound 9

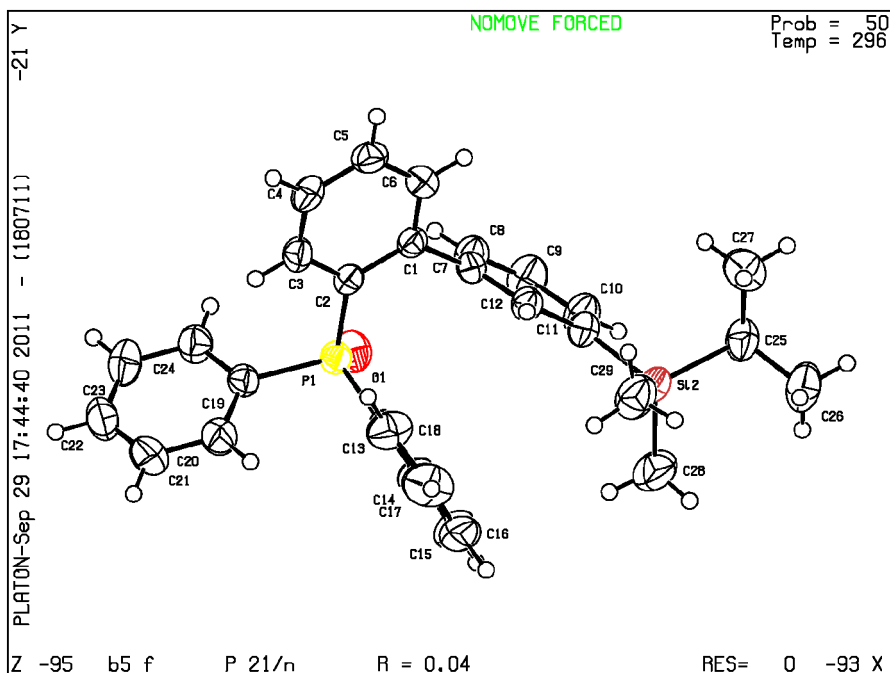

|                                   |                                                                                                    |
|-----------------------------------|----------------------------------------------------------------------------------------------------|
| CCDC number:                      | 849731                                                                                             |
| Empirical formula                 | C29 H31 O0.47 P Si                                                                                 |
| Formula weight                    | 446.12                                                                                             |
| Temperature                       | 296(2) K                                                                                           |
| Wavelength                        | 0.71073 Å                                                                                          |
| Crystal system                    | Monoclinic                                                                                         |
| Space group                       | P 21/n                                                                                             |
| Unit cell dimensions              | a = 12.3538(14) Å alpha = 90<br>b = 11.1227(12) Å beta = 91.7460(10)<br>c = 18.446(2) Å gamma = 90 |
| Volume                            | 2533.4(5) Å <sup>3</sup>                                                                           |
| Z, Calculated density             | 4, 1.170 Mg/m <sup>3</sup>                                                                         |
| Absorption coefficient            | 0.172 mm <sup>-1</sup>                                                                             |
| F(000)                            | 951                                                                                                |
| Crystal size                      | 0.30 x 0.15 x 0.15 mm                                                                              |
| Theta range for data collection   | 1.96 to 26.00 deg.                                                                                 |
| Limiting indices                  | -15<=h<=15, -13<=k<=13, -22<=l<=22                                                                 |
| Reflections collected / unique    | 25500 / 4987 [R(int) = 0.0194]                                                                     |
| Completeness to theta = 25.00     | 100.0 %                                                                                            |
| Absorption correction             | Empirical                                                                                          |
| Max. and min. transmission        | 0.9747 and 0.9503                                                                                  |
| Refinement method                 | Full-matrix least-squares on F <sup>2</sup>                                                        |
| Data / restraints / parameters    | 4987 / 1 / 294                                                                                     |
| Goodness-of-fit on F <sup>2</sup> | 1.033                                                                                              |
| Final R indices [I>2sigma(I)]     | R1 = 0.0413, wR2 = 0.1099                                                                          |
| R indices (all data)              | R1 = 0.0474, wR2 = 0.1161                                                                          |
| Largest diff. peak and hole       | 0.627 and -0.658 e.Å <sup>-3</sup>                                                                 |

Notes: The crystal cell contains a mixture of the phosphine **9** and of the corresponding phosphine oxide **10**.

Crystal data and structure refinement for compound 10.

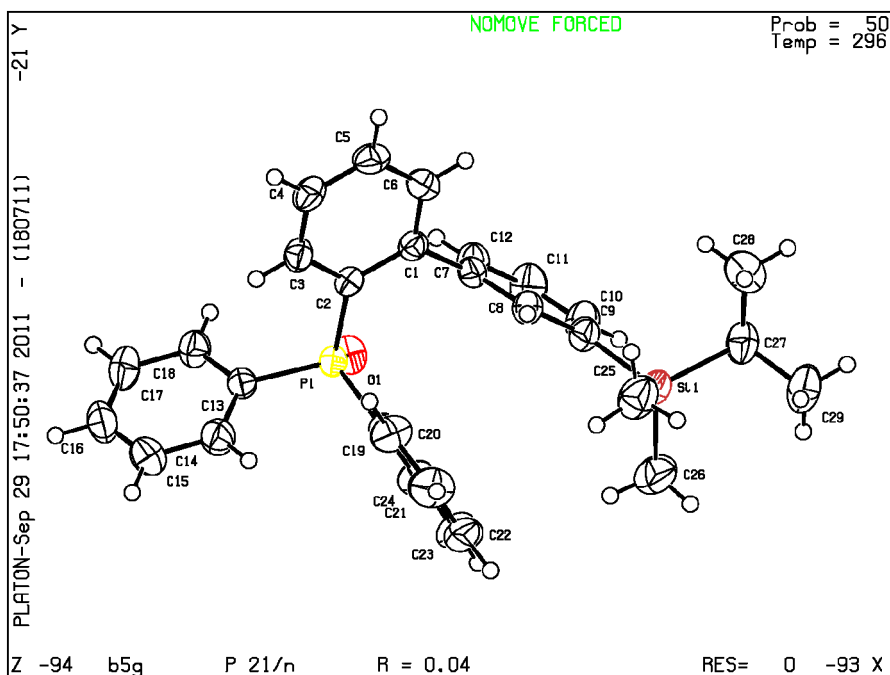

|                                   |                                                                                                            |
|-----------------------------------|------------------------------------------------------------------------------------------------------------|
| CCDC number:                      | 849732                                                                                                     |
| Empirical formula                 | C <sub>29</sub> H <sub>31</sub> O P Si                                                                     |
| Formula weight                    | 454.60                                                                                                     |
| Temperature                       | 296(2) K                                                                                                   |
| Wavelength                        | 0.71073 Å                                                                                                  |
| Crystal system                    | Monoclinic                                                                                                 |
| space group                       | P 21/n                                                                                                     |
| Unit cell dimensions              | a = 12.3039(19) Å    alpha = 90.<br>b = 11.1280(17) Å    beta = 91.632(2)<br>c = 18.544(3) Å    gamma = 90 |
| Volume                            | 2537.9(7) Å <sup>3</sup>                                                                                   |
| Z, Calculated density             | 4, 1.190 Mg/m <sup>3</sup>                                                                                 |
| Absorption coefficient            | 0.174 mm <sup>-1</sup>                                                                                     |
| F(000)                            | 968                                                                                                        |
| Crystal size                      | 0.45 x 0.40 x 0.20 mm                                                                                      |
| Theta range for data collection   | 1.96 to 28.17 deg.                                                                                         |
| Limiting indices                  | -16<=h<=16, -14<=k<=14, -24<=l<=24                                                                         |
| Reflections collected / unique    | 28424 / 6101 [R(int) = 0.0252]                                                                             |
| Completeness to theta = 28.17     | 98.1 %                                                                                                     |
| Absorption correction             | Empirical                                                                                                  |
| Max. and min. transmission        | 0.9660 and 0.9257                                                                                          |
| Refinement method                 | Full-matrix least-squares on F <sup>2</sup>                                                                |
| Data / restraints / parameters    | 6101 / 0 / 293                                                                                             |
| Goodness-of-fit on F <sup>2</sup> | 1.039                                                                                                      |
| Final R indices [I>2sigma(I)]     | R1 = 0.0374, wR2 = 0.0974                                                                                  |
| R indices (all data)              | R1 = 0.0474, wR2 = 0.1052                                                                                  |
| Largest diff. peak and hole       | 0.414 and -0.280 e.Å <sup>-3</sup>                                                                         |
